# Supplementary material for: Differentiation of Myocardial Properties in Physiological Athletic Cardiac Remodeling and Mild Hypertrophic Cardiomyopathy
Source: MDPI journal article supplement (doi:10.3390/biomedicines12020420), 2024-02-12
Supplement: s1 [file s1]

**Table S1.** Supplementary ROC analysis

|                              | AUC  | 95% CI    |
|------------------------------|------|-----------|
| <b>Echocardiography</b>      |      |           |
| E/A-ratio                    | 0.77 | 0.62–0.90 |
| E/e'                         | 0.91 | 0.82–0.99 |
| LV 3D end-diastolic volume   | 0.95 | 0.90–0.99 |
| RV 2D fractional area change | 0.78 | 0.66–0.91 |
| <b>CMR</b>                   |      |           |
| LGE %                        | 0.71 | 0.55–0.89 |
| LV ejection fraction         | 0.75 | 0.55–0.88 |
| LV end-diastolic volume      | 0.95 | 0.90–0.99 |
| RV ejection fraction         | 0.83 | 0.71–0.96 |
| RV end-diastolic volume      | 0.96 | 0.91–1.00 |

Ability of indices from echocardiography and CMR to identify HCM mutation carriers from athletes in the study population evaluated by ROC analysis. A = late diastolic mitral flow velocity. AUC = area under the curve. CI = confidence interval. CMR = cardiac magnetic resonance imaging. E = early diastolic mitral inflow velocity. e' = early diastolic mitral annular tissue velocity. HCM = hypertrophic cardiomyopathy. LGE % = late gadolinium enhancement extent expressed as percentage of the total left ventricular myocardium. LV = left ventricular. RV = right ventricular.
